# Supplementary material
Source: Springer Nature journal article supplement (https://www.springermedizin.de/resource/supplementary/12939_2010_179_MOESM3_ESM.pdf/9550552)

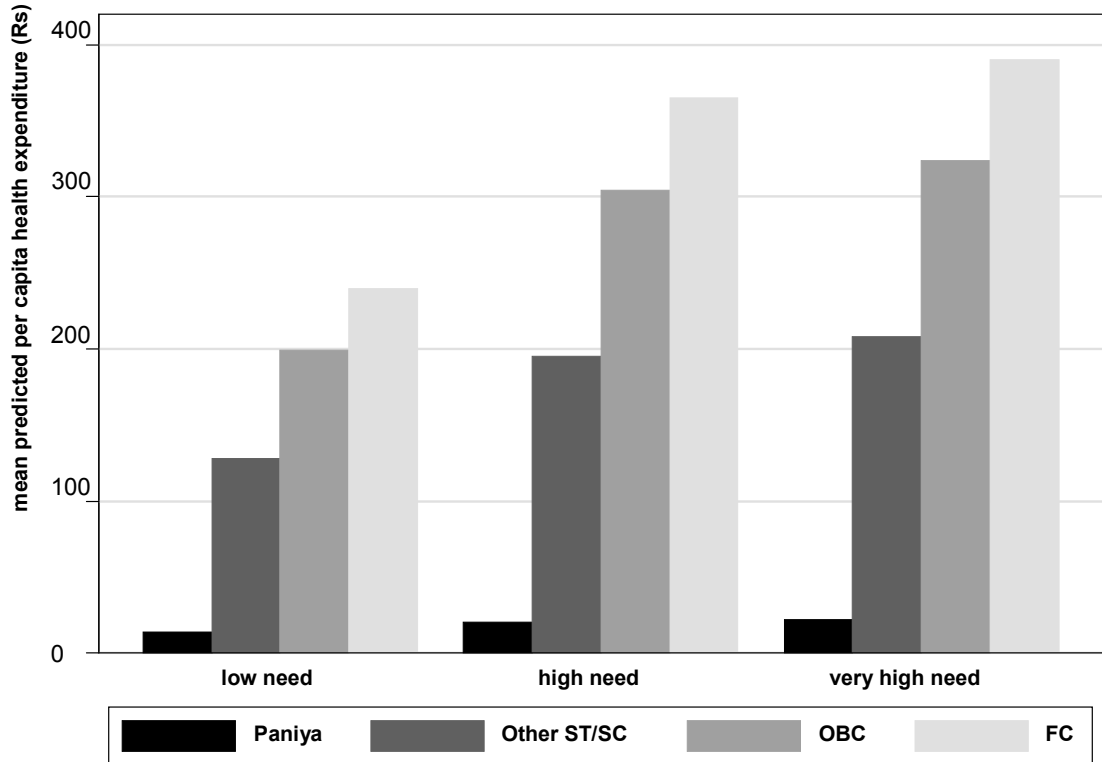

Source: Wayanad panel survey

Supplement: MOESM3 [file 9550552]
